# Supplementary material
Source: PubMed Central journal article supplement (PMC8546461)
Supplement: sj-pdf-1-vdi-10.1177_10406387211034483.pdf [file sj-pdf-1-vdi-10.1177_10406387211034483.pdf]

Abolnik C, et al. Identification of bacteria in the tracheal swabs of farmed ostriches and their effect on the viability of influenza A virus

**Supplemental Table 1.** Clinical resistance breakpoints used for antimicrobial susceptibility tests.

| Antibiotic                               | Dose   | Resistant | Intermediate | Susceptible |
|------------------------------------------|--------|-----------|--------------|-------------|
| Ampicillin                               | 10 µg  |           |              |             |
| Enterobacteriaceae                       |        | 13        | 14–16        | 17          |
| Staphylococci                            |        | 28        | –            | 29          |
| Enterococci                              |        | 16        | –            | 17          |
| Ceftiofur                                | 30 µg  | 17        | 18–20        | 21          |
| Colistin sulphate                        | 10 µg  | <11       | –            | ≥11         |
| Doxycycline                              | 30 µg  |           |              |             |
| Enterobacteriaceae                       |        | 12        | 13–17        | 18          |
| Enrofloxacin                             | 15 µg  | 16        | 19–22        | 23          |
| Erythromycin                             | 15 µg  |           |              |             |
| <i>Staphylococcus &amp; Enterococcus</i> |        | 13        | 14–22        | 23          |
| Streptococci                             |        | 15        | 16–20        | 21          |
| <i>Listeria</i>                          |        | <25       |              | ≥25         |
| Fosfomycin                               | 200 µg |           |              |             |
| <i>E. coli</i>                           |        | ≤24       | –            | ≥24         |
| Neomycin                                 | 10 µg  |           |              |             |
| Gram negatives                           |        | 12        | 13–15        | 16          |
| Kanamycin                                | 30 µg  | 13        | 14–17        | 18          |
| Sulfonamides                             | 300 µg | 12        | 13–16        | 17          |
| Trimethoprim                             | 25 µg  | 10        | –            | 16          |
| Tetracycline                             | 30 µg  |           |              |             |
| Enterobacteriaceae                       |        | 11        | 12–14        | 15          |
| Staphylococci                            |        | 17        | 18–22        | 23          |
| Streptococci                             |        | ≤18       | 19–22        | ≥23         |
| Other                                    |        | 14        | 15–18        | 19          |

**Supplemental Table 2.** Effect of bacteria isolated from ostrich tracheal swabs on the viability of influenza A virus.

| <b><i>Dietzia</i> sp. (control)</b>                                                 | Chick embryo deaths |           |           |           |           |           |
|-------------------------------------------------------------------------------------|---------------------|-----------|-----------|-----------|-----------|-----------|
| Virus titration                                                                     | Day 1               | Day 2     | Day 3     | Day 4     | Day 5     | Day 6     |
| 10 <sup>-4</sup>                                                                    | 0/6 (0/6)           | 0/6 (0/6) | 6/6 (6/6) | – (–)     | – (–)     | – (–)     |
| 10 <sup>-5</sup>                                                                    | 0/6 (0/6)           | 1/6 (0/6) | 6/6 (6/6) | – (–)     | – (–)     | – (–)     |
| 10 <sup>-6</sup>                                                                    | 0/6 (0/6)           | 0/6 (0/6) | 3/6 (6/6) | 3/6 (–)   | – (–)     | – (–)     |
| 10 <sup>-7</sup>                                                                    | 0/6 (0/6)           | 0/6 (0/6) | 3/6 (4/6) | 3/6 (2/6) | – (–)     | – (–)     |
| 10 <sup>-8</sup>                                                                    | 1/6 (0/6)           | 0/6 (1/6) | 1/6 (4/6) | 3/6 (1/6) | 0/6 (–)   | 0/6 (–)   |
| 10 <sup>-9</sup>                                                                    | 0/6 (0/6)           | 0/6 (1/6) | 1/6 (0/6) | 0/6 (4/6) | 0/6 (1/6) | 0/6 (–)   |
| 10 <sup>-10</sup>                                                                   | 0/6 (0/6)           | 0/6 (0/6) | 0/6 (0/6) | 0/6 (0/6) | 0/6 (0/6) | 0/6 (0/6) |
| Final EID <sub>50</sub> titer per 0.2 mL = 10 <sup>9.25</sup> (10 <sup>9.25</sup> ) |                     |           |           |           |           |           |
| <b><i>Corynebacterium</i> sp. (control)</b>                                         | Chick embryo deaths |           |           |           |           |           |
| Virus titration                                                                     | Day 1               | Day 2     | Day 3     | Day 4     | Day 5     | Day 6     |
| 10 <sup>-6</sup>                                                                    | 0/6 (0/6)           | 0/6 (0/6) | 0/6 (0/6) | 4/6 (6/6) | 1/6 (–)   | – (–)     |
| 10 <sup>-7</sup>                                                                    | 0/6 (0/6)           | 0/6 (0/6) | 0/6 (0/6) | 2/6 (2/6) | 0/6 (0/6) | 0/6 (1/6) |
| 10 <sup>-8</sup>                                                                    | 0/6 (0/6)           | 0/6 (0/6) | 0/6 (0/6) | 0/6 (0/6) | 0/6 (0/6) | 0/6 (0/6) |
| 10 <sup>-9</sup>                                                                    | 0/6 (0/6)           | 0/6 (0/6) | 0/6 (0/6) | 0/6 (0/6) | 0/6 (0/6) | 0/6 (0/6) |
| 10 <sup>-10</sup>                                                                   | 1/6 (0/6)           | 0/6 (0/6) | 0/6 (0/6) | 0/6 (0/6) | 0/6 (0/6) | 0/6 (0/6) |
| Final EID <sub>50</sub> titer per 0.2 mL = 10 <sup>7.40</sup> (10 <sup>7.88</sup> ) |                     |           |           |           |           |           |
| <b><i>Rothia</i> sp. (control)</b>                                                  | Chick embryo deaths |           |           |           |           |           |
| Virus titration                                                                     | Day 1               | Day 2     | Day 3     | Day 4     | Day 5     | Day 6     |
| 10 <sup>-6</sup>                                                                    | 1/6 (0/6)           | 0/6 (1/6) | 0/6 (0/6) | 0/6 (1/6) | 0/6 (0/6) | 4/6 (0/6) |
| 10 <sup>-7</sup>                                                                    | 0/6 (0/6)           | 0/6 (0/6) | 0/6 (0/6) | 0/6 (5/6) | 0/6 (0/6) | 5/6 (0/6) |
| 10 <sup>-8</sup>                                                                    | 0/6 (0/6)           | 0/6 (0/6) | 0/6 (0/6) | 0/6 (0/6) | 0/6 (0/6) | 1/6 (0/6) |
| 10 <sup>-9</sup>                                                                    | 1/6 (0/6)           | 0/6 (0/6) | 0/6 (0/6) | 0/6 (0/6) | 0/6 (0/6) | 0/6 (0/6) |
| 10 <sup>-10</sup>                                                                   | 0/6 (0/6)           | 0/6 (0/6) | 0/6 (0/6) | 0/6 (0/6) | 0/6 (0/6) | 0/6 (0/6) |
| Final EID <sub>50</sub> titer per 0.2 mL = 10 <sup>8.5</sup> (10 <sup>8.4</sup> )   |                     |           |           |           |           |           |
| <b><i>Pseudomonas putida</i> (control)</b>                                          | Chick embryo deaths |           |           |           |           |           |
| Virus titration                                                                     | Day 1               | Day 2     | Day 3     | Day 4     | Day 5     | Day 6     |
| 10 <sup>-6</sup>                                                                    | 1/5 (0/6)           | 0/5 (0/6) | 0/5 (0/6) | 0/5 (1/6) | 0/5 (0/6) | 4/5 (0/6) |
| 10 <sup>-7</sup>                                                                    | 0/5 (0/6)           | 2/5 (0/6) | 0/5 (0/6) | 0/5 (5/6) | 0/5 (0/6) | 3/5 (0/6) |
| 10 <sup>-8</sup>                                                                    | 0/5 (0/6)           | 0/5 (0/6) | 0/5 (0/6) | 0/5 (0/6) | 0/5(0/6)  | 2/5 (0/6) |
| 10 <sup>-9</sup>                                                                    | 0/5 (0/6)           | 0/5 (0/6) | 0/5 (0/6) | 0/5 (0/6) | 0/5 (0/6) | 0/5 (0/6) |
| 10 <sup>-10</sup>                                                                   | 0/5 (0/6)           | 0/5 (0/6) | 0/5 (0/6) | 0/5 (0/6) | 0/5 (0/6) | 0/5 (0/6) |
| Final EID <sub>50</sub> titer per 0.2 mL = 10 <sup>8.16</sup> (10 <sup>8.4</sup> )  |                     |           |           |           |           |           |

Identification of bacteria in ostrich tracheal swabs

| <b><i>Clostridium</i> sp. (control)</b>                                             | Chick embryo deaths |           |           |           |           |           |
|-------------------------------------------------------------------------------------|---------------------|-----------|-----------|-----------|-----------|-----------|
| Virus titration                                                                     | Day 1               | Day 2     | Day 3     | Day 4     | Day 5     | Day 6     |
| 10 <sup>-6</sup>                                                                    | 0/6 (0/6)           | 0/6 (0/6) | 0/6 (0/6) | 5/6 (5/6) | 0/6 (0/6) | 0/6 (0/6) |
| 10 <sup>-7</sup>                                                                    | 1/6 (0/6)           | 0/6 (0/6) | 0/6 (0/6) | 1/6 (1/6) | 3/6 (0/6) | 0/6 (1/6) |
| 10 <sup>-8</sup>                                                                    | 0/6 (0/6)           | 0/6 (0/6) | 0/6 (0/6) | 1/6 (0/6) | 0/6 (0/6) | 0/6 (0/6) |
| 10 <sup>-9</sup>                                                                    | 0/6 (1/6)           | 0/6 (0/6) | 0/6 (0/6) | 0/6 (0/6) | 0/6 (0/6) | 0/6 (0/6) |
| 10 <sup>-10</sup>                                                                   | 0/6 (1/6)           | 0/6 (0/6) | 0/6 (0/6) | 0/6 (0/6) | 0/6 (0/6) | 0/6 (0/6) |
| Final EID <sub>50</sub> titer per 0.2 mL = 10 <sup>7.7</sup> (10 <sup>7.5</sup> )   |                     |           |           |           |           |           |
| <b><i>Streptococcus</i> sp. (equinus). (control)</b>                                | Chick embryo deaths |           |           |           |           |           |
| Virus titration                                                                     | Day 1               | Day 2     | Day 3     | Day 4     | Day 5     | Day 6     |
| 10 <sup>-4</sup>                                                                    | 0/6 (ND)            | 0/6(ND)   | 0/6(ND)   | 0/6(ND)   | 0/6(ND)   | 3/3(ND)   |
| 10 <sup>-5</sup>                                                                    | 0/6 (ND)            | 0/6(ND)   | 0/6(ND)   | 0/6(ND)   | 0/6(ND)   | 0/6(ND)   |
| 10 <sup>-6</sup>                                                                    | 0/6 (0/6)           | 0/6 (0/6) | 0/6 (0/6) | 0/6 (0/6) | 0/6 (0/6) | 0/6 (6/6) |
| 10 <sup>-7</sup>                                                                    | 0/6 (0/6)           | 0/6 (0/6) | 0/6 (0/6) | 0/6 (0/6) | 0/6 (0/6) | 0/6 (6/6) |
| 10 <sup>-8</sup>                                                                    | 0/6 (0/6)           | 0/6 (0/6) | 0/6 (0/6) | 0/6 (0/6) | 0/6 (0/6) | 0/6 (0/6) |
| 10 <sup>-9</sup>                                                                    | 0/6 (0/6)           | 0/6 (0/6) | 0/6 (0/6) | 0/6 (0/6) | 0/6 (0/6) | 0/6 (0/6) |
| 10 <sup>-10</sup>                                                                   | 0/6 (0/6)           | 0/6 (0/6) | 0/6 (0/6) | 0/6 (0/6) | 0/6 (0/6) | 0/6 (0/6) |
| Final EID <sub>50</sub> titer per 0.2 mL = 10 <sup>4.5</sup> (10 <sup>8.6</sup> )   |                     |           |           |           |           |           |
| <b><i>Rhodotorula</i> sp. (control)</b>                                             | Chick embryo deaths |           |           |           |           |           |
| Virus titration                                                                     | Day 1               | Day 2     | Day 3     | Day 4     | Day 5     | Day 6     |
| 10 <sup>-6</sup>                                                                    | 0/6 (0/6)           | 0/6 (0/6) | 2/6 (0/6) | 4/6 (3/6) | – (2/6)   | – (0/6)   |
| 10 <sup>-7</sup>                                                                    | 0/6 (0/6)           | 0/6 (0/6) | 0/6 (0/6) | 4/6 (5/6) | 2/6 (0/6) | – (0/6)   |
| 10 <sup>-8</sup>                                                                    | 0/6 (0/6)           | 0/6 (0/6) | 0/6 (0/6) | 0/6 (0/6) | 0/6 (0/6) | 0/6 (0/6) |
| 10 <sup>-9</sup>                                                                    | 0/6 (0/6)           | 0/6 (0/6) | 0/6 (0/6) | 0/6 (0/6) | 0/6 (0/6) | 0/6 (0/6) |
| 10 <sup>-10</sup>                                                                   | 0/6 (0/6)           | 0/6 (0/6) | 0/6 (0/6) | 0/6 (0/6) | 0/6 (0/6) | 0/6 (0/6) |
| Final EID <sub>50</sub> titer per 0.2 mL = 10 <sup>8.53</sup> (10 <sup>8.40</sup> ) |                     |           |           |           |           |           |
| <b><i>Staphylococcus</i> sp. (control)</b>                                          | Chick embryo deaths |           |           |           |           |           |
| Virus titration                                                                     | Day 1               | Day 2     | Day 3     | Day 4     | Day 5     | Day 6     |
| 10 <sup>-6</sup>                                                                    | 0/6 (0/6)           | 0/6 (0/6) | 2/6 (2/6) | 0/6 (0/6) | 0/6 (0/6) | 3/6 (4/6) |
| 10 <sup>-7</sup>                                                                    | 0/6 (0/6)           | 0/6 (0/6) | 0/6 (1/6) | 0/6 (0/6) | 0/6 (0/6) | 3/6 (4/6) |
| 10 <sup>-8</sup>                                                                    | 0/6 (0/6)           | 0/6 (0/6) | 0/6 (0/6) | 0/6 (0/6) | 0/6 (0/6) | 1/6 (1/6) |
| 10 <sup>-9</sup>                                                                    | 0/6 (0/6)           | 0/6 (0/6) | 0/6 (0/6) | 0/6 (0/6) | 0/6 (0/6) | 0/6 (0/6) |
| Final EID <sub>50</sub> titer per 0.2 mL = 10 <sup>8.36</sup> (10 <sup>8.75</sup> ) |                     |           |           |           |           |           |

Identification of bacteria in ostrich tracheal swabs

| <b><i>Arthrobacter gandavensis</i> (control)</b>                                    |           | Chick embryo deaths |           |           |           |           |
|-------------------------------------------------------------------------------------|-----------|---------------------|-----------|-----------|-----------|-----------|
| Virus titration                                                                     | Day 1     | Day 2               | Day 3     | Day 4     | Day 5     | Day 6     |
| 10 <sup>-6</sup>                                                                    | 0/6 (0/6) | 0/6 (0/6)           | 3/6 (2/6) | 0/6 (0/6) | 0/6 (0/6) | 2/6 (4/6) |
| 10 <sup>-7</sup>                                                                    | 0/6 (0/6) | 0/6 (0/6)           | 3/6 (1/6) | 0/6 (0/6) | 0/6 (0/6) | 2/6 (4/6) |
| 10 <sup>-8</sup>                                                                    | 1/6 (0/6) | 0/6 (0/6)           | 0/6 (0/6) | 0/6 (0/6) | 0/6 (0/6) | 0/6 (1/6) |
| 10 <sup>-9</sup>                                                                    | 0/6 (0/6) | 0/6 (0/6)           | 0/6 (0/6) | 0/6 (0/6) | 0/6 (0/6) | 0/6 (0/6) |
| Final EID <sub>50</sub> titer per 0.2 mL = 10 <sup>8.5</sup> (10 <sup>8.75</sup> )  |           |                     |           |           |           |           |
| <b><i>Acinetobacter</i> sp. (control)</b>                                           |           | Chick embryo deaths |           |           |           |           |
| Virus titration                                                                     | Day 1     | Day 2               | Day 3     | Day 4     | Day 5     | Day 6     |
| 10 <sup>-6</sup>                                                                    | 0/6 (0/6) | 0/6 (0/6)           | 0/6 (6/6) | 0/6 (-)   | 6/6 (-)   | - (-)     |
| 10 <sup>-7</sup>                                                                    | 0/6 (0/6) | 0/6 (0/6)           | 1/6 (1/6) | 2/6 (0/6) | 0/6 (2/6) | 2/6 (2/6) |
| 10 <sup>-8</sup>                                                                    | 0/6 (0/6) | 0/6 (0/6)           | 1/6 (0/6) | 1/6 (0/6) | 0/6 (3/6) | 1/6 (0/6) |
| 10 <sup>-9</sup>                                                                    | 0/6 (0/6) | 0/6 (0/6)           | 0/6 (0/6) | 0/6 (0/6) | 0/6 (0/6) | 1/6 (0/6) |
| Final EID <sub>50</sub> titer per 0.2 mL = 10 <sup>8.76</sup> (10 <sup>8.88</sup> ) |           |                     |           |           |           |           |
| <b><i>Streptomyces</i> sp. (control)</b>                                            |           | Chick embryo deaths |           |           |           |           |
| Virus titration                                                                     | Day 1     | Day 2               | Day 3     | Day 4     | Day 5     | Day 6     |
| 10 <sup>-6</sup>                                                                    | 0/6 (0/6) | 0/6 (0/6)           | 2/6 (6/6) | 4/6 (-)   | - (-)     | - (-)     |
| 10 <sup>-7</sup>                                                                    | 0/6 (0/6) | 0/6 (0/6)           | 0/6 (1/6) | 2/6 (0/6) | 2/6 (2/6) | 0/6 (2/6) |
| 10 <sup>-8</sup>                                                                    | 0/6 (0/6) | 0/6 (0/6)           | 1/6 (0/6) | 0/6 (0/6) | 0/6 (3/6) | 4/6 (0/6) |
| 10 <sup>-9</sup>                                                                    | 0/6 (0/6) | 0/6 (0/6)           | 0/6 (0/6) | 0/6 (0/6) | 0/6 (0/6) | 0/6 (0/6) |
| Final EID <sub>50</sub> titer per 0.2 mL = 10 <sup>8.23</sup> (10 <sup>8.88</sup> ) |           |                     |           |           |           |           |
| <b><i>Pantoea</i> sp. (control)</b>                                                 |           | Chick embryo deaths |           |           |           |           |
| Virus titration                                                                     | Day 1     | Day 2               | Day 3     | Day 4     | Day 5     | Day 6     |
| 10 <sup>-3</sup>                                                                    | 0/6 (ND)  | 0/6 (ND)            | 6/0 (ND)  | - (ND)    | - (ND)    | - (ND)    |
| 10 <sup>-4</sup>                                                                    | 0/6 (ND)  | 0/6 (ND)            | 1/5 (ND)  | 0/6 (ND)  | 0/6 (ND)  | 1/6 (ND)  |
| 10 <sup>-5</sup>                                                                    | 0/6 (ND)  | 0/6 (ND)            | 0/6 (ND)  | 0/6 (ND)  | 0/6 (ND)  | 0/6 (ND)  |
| 10 <sup>-6</sup>                                                                    | 0/6 (0/6) | 0/6 (0/6)           | 0/6 (6/6) | 0/6 (-)   | 0/6 (-)   | 0/6 (-)   |
| 10 <sup>-7</sup>                                                                    | 0/6 (0/6) | 0/6 (0/6)           | 0/6 (1/6) | 0/6(3/6)  | 0/6 (2/6) | 0/6 (2/6) |
| 10 <sup>-8</sup>                                                                    | 0/6 (0/6) | 0/6 (0/6)           | 0/6 (0/6) | 0/6 (3/6) | 0/6 (0/6) | 0/6 (0/6) |
| 10 <sup>-9</sup>                                                                    | 0/6 (0/6) | 0/6 (0/6)           | 0/6 (0/6) | 0/6 (0/6) | 0/6 (0/6) | 0/6 (0/6) |
| 10 <sup>-10</sup>                                                                   | 0/6 (0/6) | 0/6 (0/6)           | 0/6 (0/6) | 0/6 (0/6) | 0/6 (0/6) | 0/6 (0/6) |
| Final EID <sub>50</sub> titer per 0.2 mL = 10 <sup>5.25</sup> (10 <sup>8.88</sup> ) |           |                     |           |           |           |           |

Identification of bacteria in ostrich tracheal swabs

| <i>Citrobacter freundii</i> (control)                                               | Chick embryo deaths |           |           |           |           |           |
|-------------------------------------------------------------------------------------|---------------------|-----------|-----------|-----------|-----------|-----------|
| Virus titration                                                                     | Day 1               | Day 2     | Day 3     | Day 4     | Day 5     | Day 6     |
| 10 <sup>-3</sup>                                                                    | 0/6 (ND)            | 0/6 (ND)  | 2/6 (ND)  | 0/6 (ND)  | 0/6 (ND)  | 4/6 (ND)  |
| 10 <sup>-4</sup>                                                                    | 0/6 (ND)            | 0/6 ((ND) | 0/6 (ND)  | 0/6 (ND)  | 0/6 (ND)  | 3/6 (ND)  |
| 10 <sup>-5</sup>                                                                    | 0/6 (ND)            | 0/6 (ND)  | 0/6 (ND)  | 0/6 (ND)  | 0/6 (ND)  | 3/6 (ND)  |
| 10 <sup>-6</sup>                                                                    | 0/6 (0/6)           | 0/6 (0/6) | 0/6 (6/6) | 0/6 (-)   | 0/6 (-)   | 0/6 (-)   |
| 10 <sup>-7</sup>                                                                    | 0/6 (0/6)           | 0/6 (0/6) | 0/6 (1/6) | 0/6(3/6)  | 0/6 (2/6) | 0/6 (2/6) |
| 10 <sup>-8</sup>                                                                    | 0/6 (0/6)           | 0/6 (0/6) | 0/6 (0/6) | 0/6 (3/6) | 0/6 (0/6) | 0/6 (0/6) |
| 10 <sup>-9</sup>                                                                    | 0/6 (0/6)           | 0/6 (0/6) | 0/6 (0/6) | 0/6 (0/6) | 0/6 (0/6) | 0/6 (0/6) |
| 10 <sup>-10</sup>                                                                   | 0/6 (0/6)           | 0/6 (0/6) | 0/6 (0/6) | 0/6 (0/6) | 0/6 (0/6) | 0/6 (0/6) |
| Final EID <sub>50</sub> titer per 0.2 mL = 10 <sup>5.33</sup> (10 <sup>8.88</sup> ) |                     |           |           |           |           |           |

– = all eggs dead; ND = not done.
